# Supplementary material
Source: PubMed Central journal article supplement (PMC6978157)
Supplement: bloodBLD2019001793-suppl1.pdf [file bloodBLD2019001793-suppl1.pdf]

## Supplementary Material to:

# CLONAL HEMATOPOIESIS IN ELDERLY TWINS: CONCORDANCE, DISCORDANCE AND MORTALITY

### Next-Generation Sequencing panel

We designed a TruSeq Custom Amplicon panel (Illumina, San Diego, CA, USA) with an amplicon length of 250 base pairs (bp) covering more than 95% of known mutations identified in publications on clonal hemaptoiesis<sup>1-6</sup>. Library preparation was performed according to the manufacturer's protocol, including pre-PCR addition of random unique molecular identifier (UMI) nucleotide strands. Genes and chromosomal coordinates are listed below:

| Gene          | Chr | hg19 coordinates (start stop) |
|---------------|-----|-------------------------------|
| <i>ASXL1</i>  | 20  | (310 25234 310 21081)         |
| <i>ASXL2</i>  | 2   | (25964888 26101101)           |
| <i>DNMT3A</i> | 2   | (25457124 25536945)           |
| <i>IDH1</i>   | 2   | (209113424 209112994)         |
| <i>IDH2</i>   | 15  | (90631736 90632009)           |
| <i>PPM1D</i>  | 17  | (58740350 58740919)           |
| <i>RAD21</i>  | 8   | (117859733 117866713)         |
| <i>SF3B1</i>  | 2   | (198266563 198267800)         |
| <i>SRSF2</i>  | 17  | (74732237 74733248)           |
| <i>TET2</i>   | 4   | (106155075 106197718)         |
| <i>TP53</i>   | 17  | (7572833 7579961)             |
| <i>JAK2</i>   | 9   | (5073674 5073808)             |
| <i>GNB1</i>   | 1   | Full coding sequence          |
| <i>GNAS</i>   | 20  | (57415162 57415896)           |
|               | 20  | (57478578 57480535)           |
|               | 20  | (57484212 57485886)           |
| <i>ETV6</i>   | 12  | (11803056 12043986)           |
| <i>CREBBP</i> | 16  | (3786120 3786810)             |
|               | 16  | (3781300 3781802)             |
| <i>NRAS</i>   | 1   | (115256421 115256599)         |
|               | 1   | (115258671 115258781)         |
| <i>KRAS</i>   | 12  | (25380168 25380346)           |
|               | 12  | (25398208 25398318)           |
| <i>CBL</i>    | 11  | Full coding sequence          |
| <i>BRCC3</i>  | X   | (154299797 154348431)         |
| <i>BCOR</i>   | X   | (39911356 39937188)           |

## Sequence analysis

Each read of the 150bp paired-end raw FASTQ included a 6bp UMI tag. Using the extract program in the UMI-tools software (v0.5.0)<sup>7</sup>, the UMI 6mers were removed from the read sequence, combined with the corresponding mate-pair into a 12bp identifier and moved to the read name files of each mate. Corresponding FASTQ files were aligned to the reference hg19 genome with the bwa-mem implementation of the Burrows–Wheeler algorithm<sup>8</sup>. PCR duplicates were removed based on the UMI information using the dedup program in UMI-tools. QC and visual inspection of the alignments and amplicon coverage were assessed with the R package TarSeqQC<sup>9</sup>. Identification of the variants on the filtered BAM files was performed with two variant callers; Freebayes<sup>10</sup> and VarDict<sup>11</sup>. All the variants were annotated using snpEff (v4.2)<sup>12</sup> for gene name, amino acid change, rare variants (ExAC, dbSNP), cancer mutation records (COSMIC) and effect predictor (VEP).

## Variant calling

Curation of mutations was performed blinded to clinical data. A manual assessment of all variants was performed, which included visualization in Integrated Genome Viewer (Broad Institute, Cambridge, MA). Exclusion criteria were:

- Coverage below 200x
- Alternative variant with read count below 5
- Variant allele frequency below 2%
- Area with excessive local noise
- Strand biased call explained by sequencing error
- Synonymous changes
- Known sequencing artefact based on >1000 samples analyzed by the same panel
- Known as a common polymorphism in the normal population (>1% frequency in ExAC, TOPMED or 1000G)
- Annotated as benign polymorphism in ClinVar
- Known rare variants and missenses mutations with a variant allele frequency of 40-60%, and not previously described as pathogenic. In MZ twins the presence of rare variants in both twins confirmed a germline origin.

Additional assessment criteria supporting inclusion of variant

- Variants identified in multiple UMI families<sup>13</sup>
- Known COSMIC reference

For each individual gene we used the following filtering:

| Gene   | Chromosome | Accession | Reported mutations used for variant calling                                   |
|--------|------------|-----------|-------------------------------------------------------------------------------|
| ASXL1  | 20         | NM_015338 | Frameshift/nonsense/splice-site in exon 11-12                                 |
| ASXL2  | 2          | NM_018263 | Frameshift/nonsense/splice-site                                               |
| DNMT3A | 2          | NM_022552 | Frameshift/nonsense/splice-site; Missense in p.292-350 / p.482-614/ p.634-912 |
| IDH1   | 2          | NM_005896 | Missense at R132                                                              |
| IDH2   | 15         | NM_002168 | Missense at R140 and R172                                                     |

|        |    |              |                                                                                                    |
|--------|----|--------------|----------------------------------------------------------------------------------------------------|
| PPM1D  | 17 | NM_003620    | Frameshift/nonsense in exon 5/6                                                                    |
| RAD21  | 8  | NM_006265    | Frameshift/nonsense/splice-site                                                                    |
| SF3B1  | 2  | NM_012433    | Missense in terminal HEAT domains (p.529-1201)                                                     |
| SRSF2  | 17 | NM_003016    | Missense/deletion involving p.P95                                                                  |
| TET2   | 4  | NM_001127208 | TET2 Frameshift/nonsense/splice-site; Missense in conserved domains (p.1104-1481 and p.1843-2002)  |
| TP53   | 17 | NM_001126112 | Frameshift/nonsense/splice-site; Missense in DNA-binding domain (p.95-288); Missense at P72 / R337 |
| JAK2   | 9  | NM_004972    | JAK2 V617F and Missense/indel in aa range p.536-547                                                |
| GNB1   | 1  | NM_002074    | Missense at K57 / I80                                                                              |
| GNAS   | 20 | NM_016592    | GNAS Missense at R201                                                                              |
| ETV6   | 12 | NM_001987    | Frameshift/nonsense/splice-site                                                                    |
| CREBBP | 16 | NM_004380    | Frameshift/nonsense/splice-site                                                                    |
| NRAS   | 1  | NM_002524    | Missense at G12 / G13 / Q61                                                                        |
| KRAS   | 12 | NM_033360    | Missense at G12 / G13 / Q61 / A146                                                                 |
| CBL    | 11 | NM_005188    | Missense in Linker/RING finger domains p.345-434                                                   |
| BRCC3  | X  | NM_024332    | Frameshift/nonsense/splice-site                                                                    |
| BCOR   | X  | NM_001123385 | Frameshift/nonsense/splice-site                                                                    |

#### Hematological cancer and cytopenia ICD-10 codes.

All diagnosis from the cohort was identified and we created two groups of diagnoses

Hematological cancers including the following ICD-10 diagnosis.

|                                                                                                |
|------------------------------------------------------------------------------------------------|
| DD45 - Polycythemia vera                                                                       |
| DD46 - Myelodysplastic syndromes                                                               |
| DD47 - Mast cell neoplasms of uncertain behavior                                               |
| DC81 - Hodgkin lymphoma                                                                        |
| DC82 - Follicular lymphoma                                                                     |
| DC83 - Non-follicular lymphoma                                                                 |
| DC84 - Mature T/NK-cell lymphomas                                                              |
| DC85 - Other specified and unspecified types of non-Hodgkin lymphoma                           |
| DC86 - Other specified types of T/NK-cell lymphoma                                             |
| DC88 - Malignant immunoproliferative diseases and certain other B-cell lymphomas               |
| DC90 - Multiple myeloma and malignant plasma cell neoplasms                                    |
| DC91 - Lymphoid leukemia                                                                       |
| DC92 - Myeloid leukemia                                                                        |
| DC93 - Monocytic leukemia                                                                      |
| DC94 - Other leukemias of specified cell type                                                  |
| DC95 - Leukemia of unspecified cell type                                                       |
| DC96 - Other and unspecified malignant neoplasms of lymphoid, hematopoietic and related tissue |

The group of unspecified cytopenia included the following diagnoses

DD619A – Pancytopenia, unspecified  
 DD693 - Immune thrombocytopenic purpura  
 DD696 - Thrombocytopenia, unspecified  
 DD613 - Idiopathic aplastic anemia  
 DD63 - Anemia in chronic diseases classified elsewhere  
 DD618 - Other specified aplastic anemias and other bone marrow failure syndromes  
 DD649 - Anemia, unspecified  
 DD694 - Other primary thrombocytopenia  
 DD70 – Neutropenia

**Supplementary Table 1a and b Cox regression model including the VAF grouped as maximum VAF<10% vs >=10%.**

**A**

| Variable              | HR    | 95% CI    | P      |
|-----------------------|-------|-----------|--------|
| VAF < 10%             | 1.16  | 0.94-1.43 | 0.115  |
| VAF >=10%             | 1.120 | 0.93-1.54 | 0.205  |
| Age (years)           | 1.11  | 1.08-1.13 | <0.001 |
| Sex (male)            | 1.15  | 0.91-1.45 | 0.252  |
| Smoking (1st tertile) | 1.02  | 0.81-1.29 | 0.852  |
| Smoking (2nd tertile) | 1.22  | 0.96-1.55 | 0.101  |
| Smoking (3rd tertile) | 1.70  | 1.23-2.35 | 0.001  |

\*VAF = Variant allele frequency

**B**

| Variable              | HR   | 95% CI    | P     |
|-----------------------|------|-----------|-------|
| VAF < 10%             | 1.12 | 0.91-1.38 | 0.299 |
| VAF >=10%             | 1.16 | 0.91-1.49 | 0.267 |
| Sex (male)            | 1.14 | 0.90-1.44 | 0.267 |
| Smoking (1st tertile) | 1.03 | 0.82-1.29 | 0.787 |
| Smoking (2nd tertile) | 1.26 | 1.00-1.59 | 0.053 |
| Smoking (3rd tertile) | 1.73 | 1.26-2.37 | 0.001 |

\*VAF = Variant allele frequency

In table **A** time since blood sample is used as the underlying time scale whereas age is used as the underlying the time scale in **B**, and almost similar results were found.

### Supplementary Table 2

#### Risk of developing hematological cancer, competing risk analysis according to CHIP mutational status

| Variable              | HR    | 95% CI     | P     |
|-----------------------|-------|------------|-------|
| Mutation (yes/no)     | 1.80  | 0.87-3.75  | 0.115 |
| Age (years)           | 0.94  | 0.86-1.04  | 0.234 |
| Sex (male)            | 0.88  | 0.42-1.82  | 0.722 |
| Smoking (1st tertile) | 0.88  | 0.32-2.43  | 0.808 |
| Smoking (2nd tertile) | 0.123 | 0.016-0.95 | 0.045 |
| Smoking (3rd tertile) | 1.04  | 0.44-2.48  | 0.932 |

The risk of developing a hematological cancer (as defined above), was not associated with clonal hematopoiesis after adjusting for age, sex and tobacco consumption. A total of 27 twins developed a hematological cancer during follow up. Of those 19 were classified as a lymphoid neoplasm and eight as a myeloid neoplasm.

### Supplementary Table 3

#### Risk of developing unspecified cytopenia, competing risk analysis according CHIP mutational status

| Variable              | HR   | 95% CI    | P     |
|-----------------------|------|-----------|-------|
| Mutation (yes/no)     | 1.59 | 0.99-2.54 | 0.052 |
| Age (years)           | 0.96 | 0.91-1.02 | 0.158 |
| Sex (male)            | 1.24 | 0.75-2.04 | 0.403 |
| Smoking (1st tertile) | 0.92 | 0.48-1.77 | 0.802 |
| Smoking (2nd tertile) | 0.63 | 0.31-1.30 | 0.211 |
| Smoking (3rd tertile) | 1.01 | 0.54-1.90 | 0.980 |

A total of 74 twins developed an unspecified cytopenia during follow up, and as the only variable clonal hematopoiesis had a borderline significant association with the development of unspecified cytopenia after adjusting for age, sex and tobacco consumption.

Supplementary Figure 1a and b

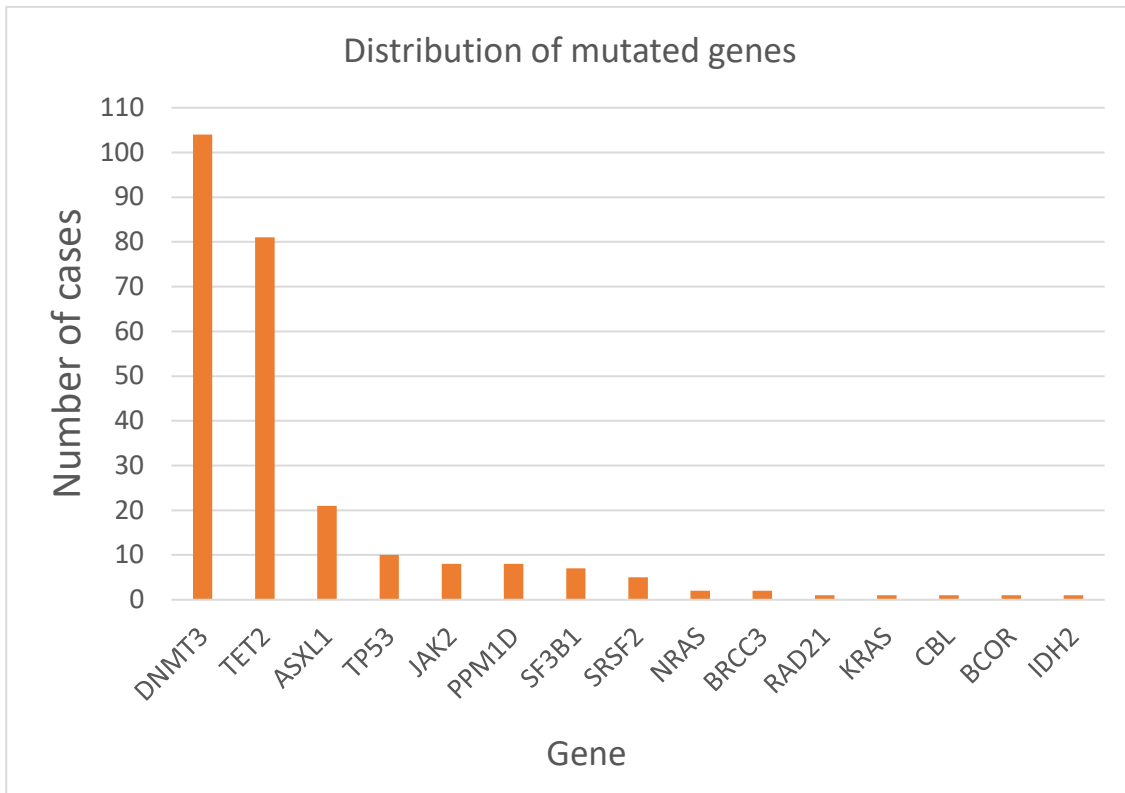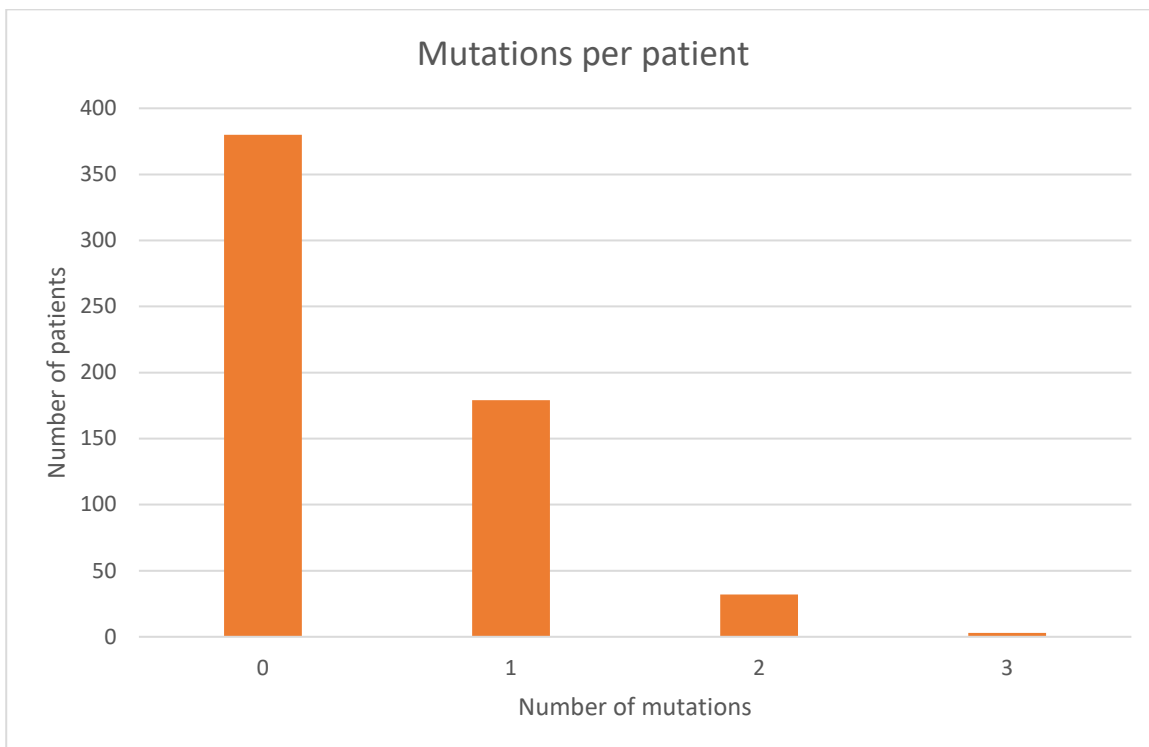

1a cases with a mutation in the affected gene and 1b number of different genes mutated per twin.

Supplementary Figure 2

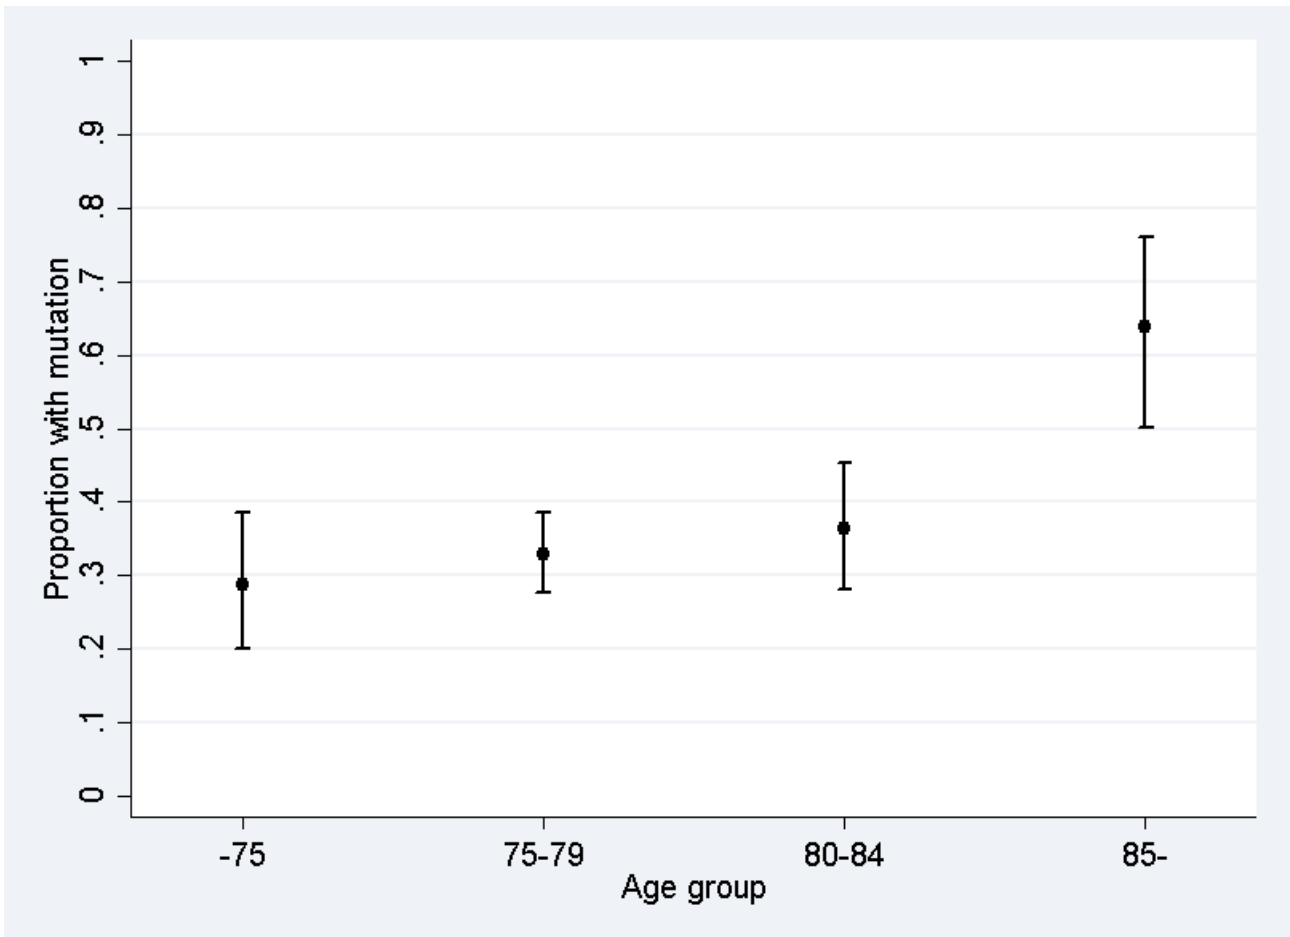

Proportion of individuals with a mutation according to age group. There were 101 twins between 73-75 years, 306 between 75-79 years, 129 between 80-85 years and 58 were 85 years or above at the time of inclusion in the study in 1997.

Supplementary Figure 3a and b.

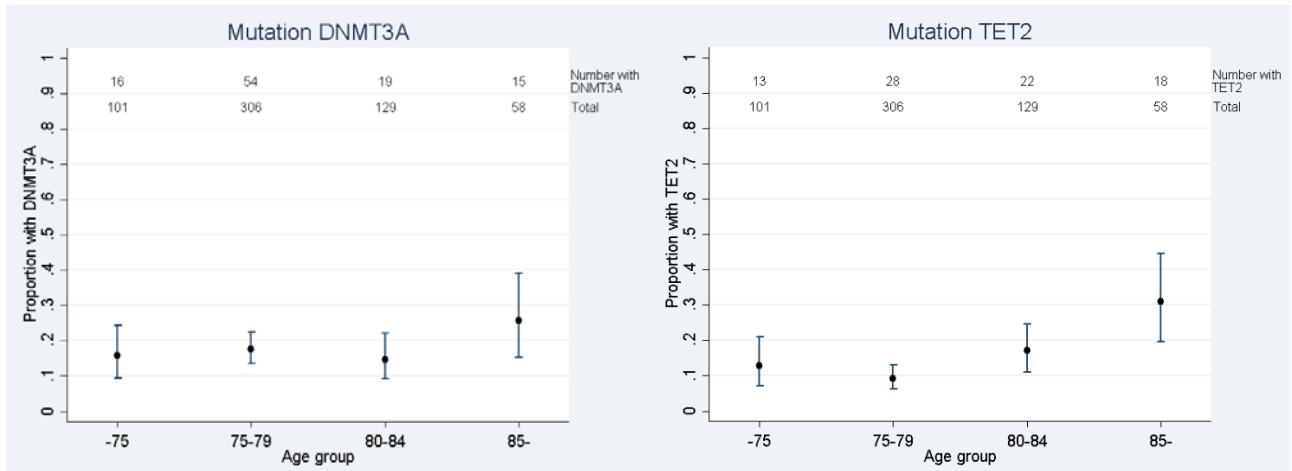

A

B

The distribution of mutations in (A) *DNMT3A* and (B) *TET2* according to age group. The total number and number affected in each age group can be seen above the barplot.



Supplementary figure 4

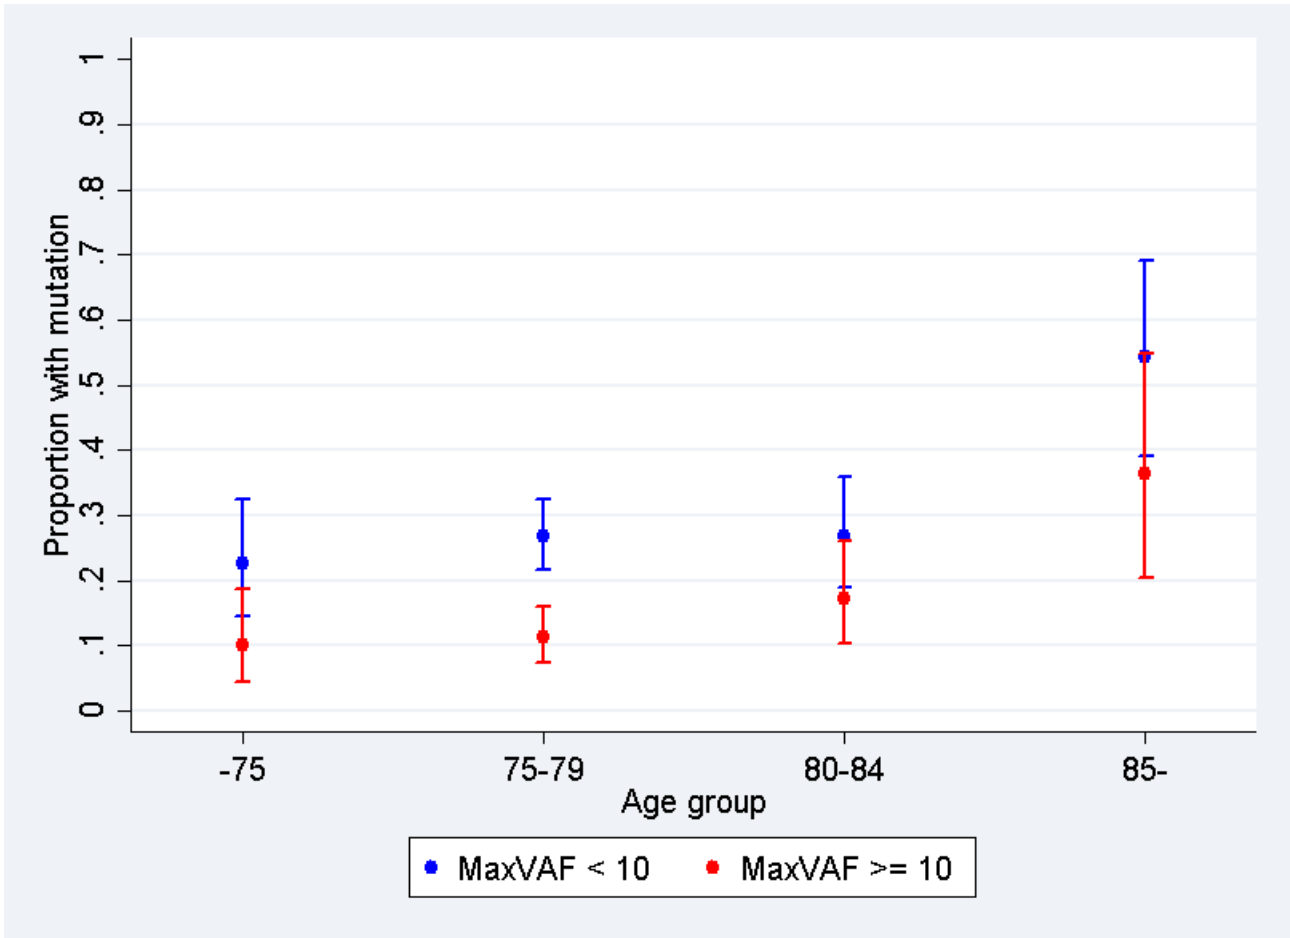

The proportion of samples grouped according to after the allele frequency of the mutations with the highest VAF within each case.

1. Jaiswal S, Fontanillas P, Flannick J, et al. Age-Related Clonal Hematopoiesis Associated with Adverse Outcomes. *N. Engl. J. Med.* 2014;371(26):2488–2498.
2. Genovese G, Kähler AK, Handsaker RE, et al. Clonal hematopoiesis and blood-cancer risk inferred from blood DNA sequence. *N. Engl. J. Med.* 2014;371(26):2477–87.
3. Gibson CJ, Lindsley RC, Tchekmedyian V, et al. Clonal Hematopoiesis Associated With Adverse Outcomes After Autologous Stem-Cell Transplantation for Lymphoma. *J Clin Oncol.* 2017;35:.
4. Gillis NK, Ball M, Zhang Q, et al. Clonal haemopoiesis and therapy-related myeloid malignancies in elderly patients: a proof-of-concept, case-control study. *Lancet. Oncol.* 2017;18(1):112–121.
5. Takahashi K, Wang F, Kantarjian H, et al. Preleukaemic clonal haemopoiesis and risk of therapy-related myeloid neoplasms: a case-control study. *Lancet. Oncol.* 2017;18(1):100–111.
6. Xie M, Lu C, Wang J, et al. a n a l y s i s Age-related mutations associated with clonal hematopoietic expansion and malignancies. *Nat. Med.* 2014;20(12):1472–1478.
7. Smith T, Heger A, Sudbery I. UMI-tools: modeling sequencing errors in Unique Molecular Identifiers to improve quantification accuracy. *Genome Res.* 2017;27(3):491–499.
8. Li H, Durbin R. Fast and accurate long-read alignment with Burrows-Wheeler transform. *Bioinformatics.* 2010;26(5):589–95.
9. Merino GA, Murua YA, Fresno C, et al. TarSeqQC: Quality control on targeted sequencing experiments in R. *Hum. Mutat.* 2017;38(5):494–502.
10. Garrison E, Marth G. Haplotype-based variant detection from short-read sequencing. 2012;
11. Lai Z, Markovets A, Ahdesmaki M, et al. VarDict: a novel and versatile variant caller for next-generation sequencing in cancer research. *Nucleic Acids Res.* 2016;44(11):e108.
12. Cingolani P, Platts A, Wang LL, et al. A program for annotating and predicting the effects of single nucleotide polymorphisms, SnpEff: SNPs in the genome of *Drosophila melanogaster* strain w1118; iso-2; iso-3. *Fly (Austin).* 6(2):80–92.
13. Young AL, Challen GA, Birman BM, Druley TE. Clonal haematopoiesis harbouring AML-associated mutations is ubiquitous in healthy adults. *Nat. Commun.* 2016;7:1–7.
